# Supplementary material for: Multi-cohort analysis of host immune response identifies conserved protective and detrimental modules associated with severity irrespective of virus
Source: bioRxiv or medRxiv preprint supplement (doi:10.1101/2020.10.02.20205880), 2020-10-05

**Figure S1**

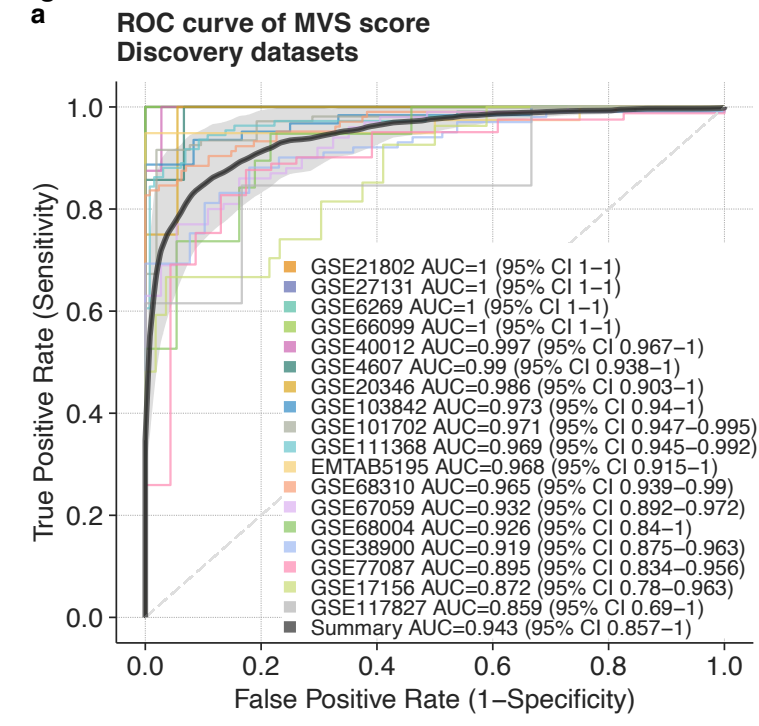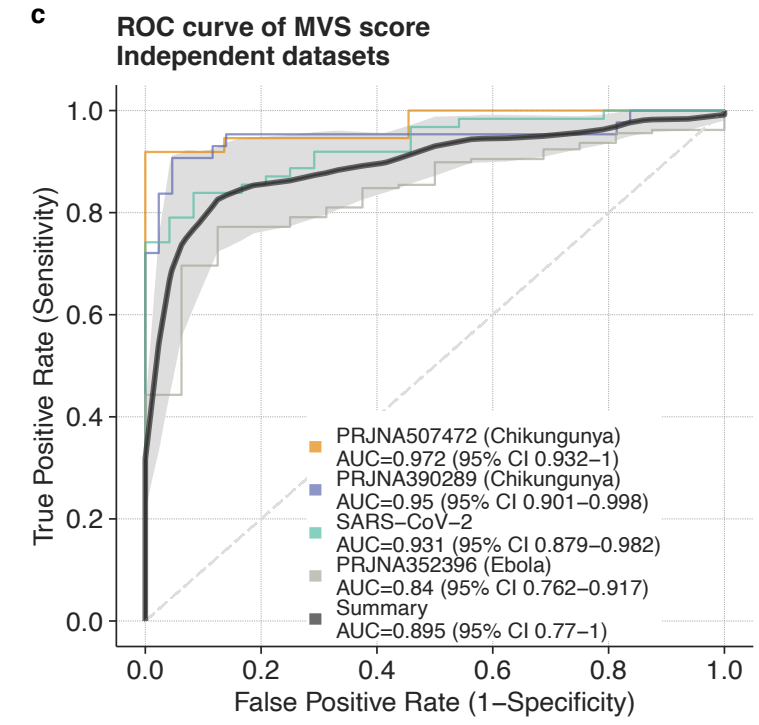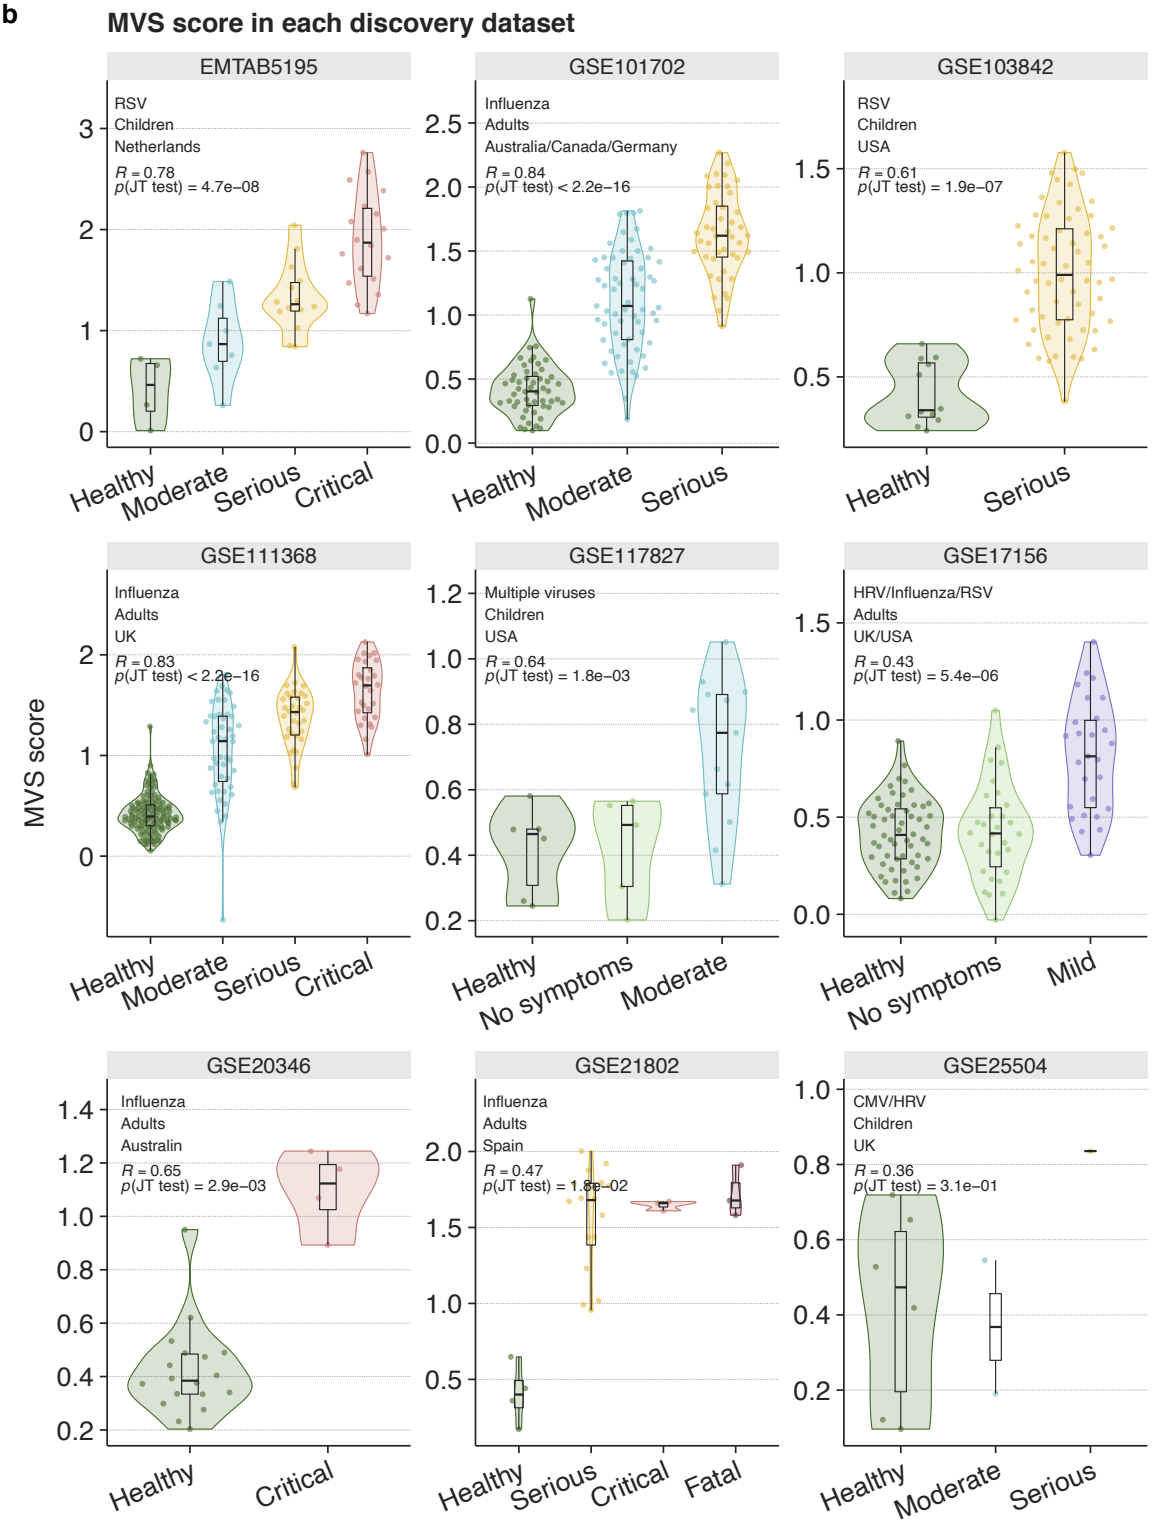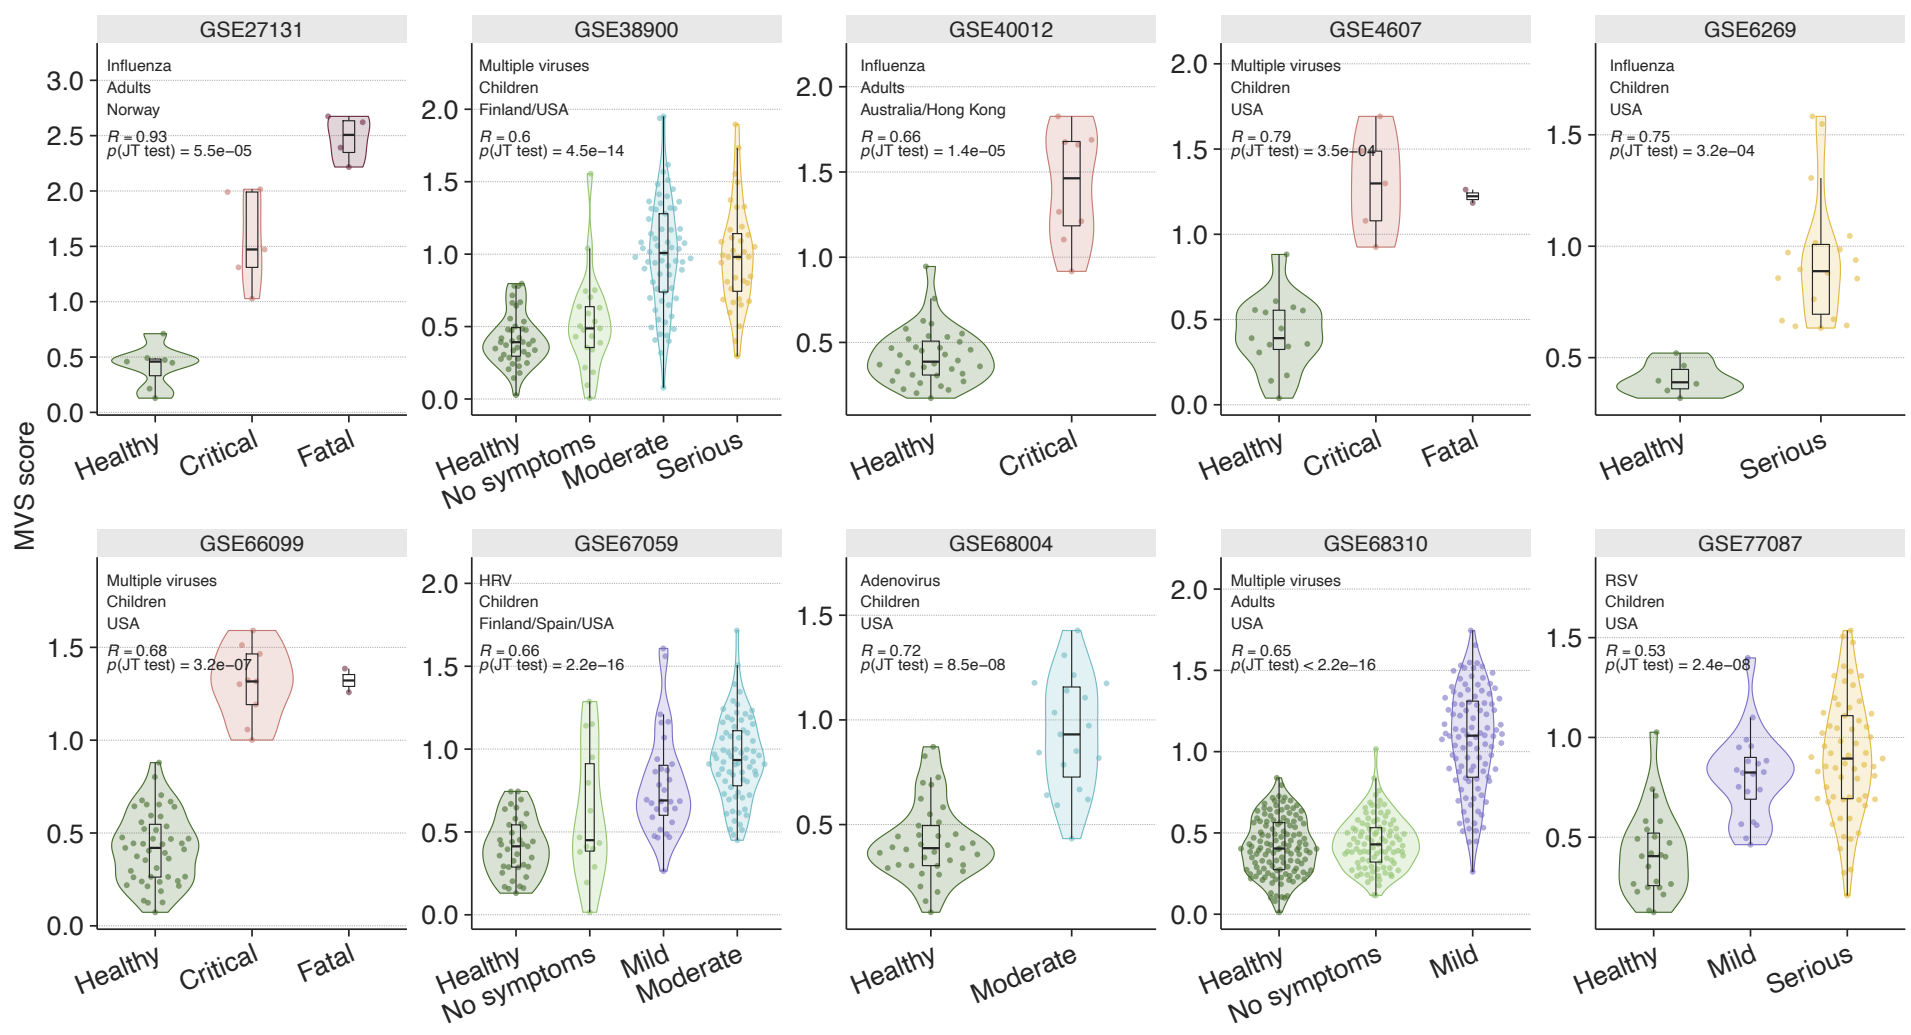

Figure S2

a. MVS score in each sample in scRNA-seq

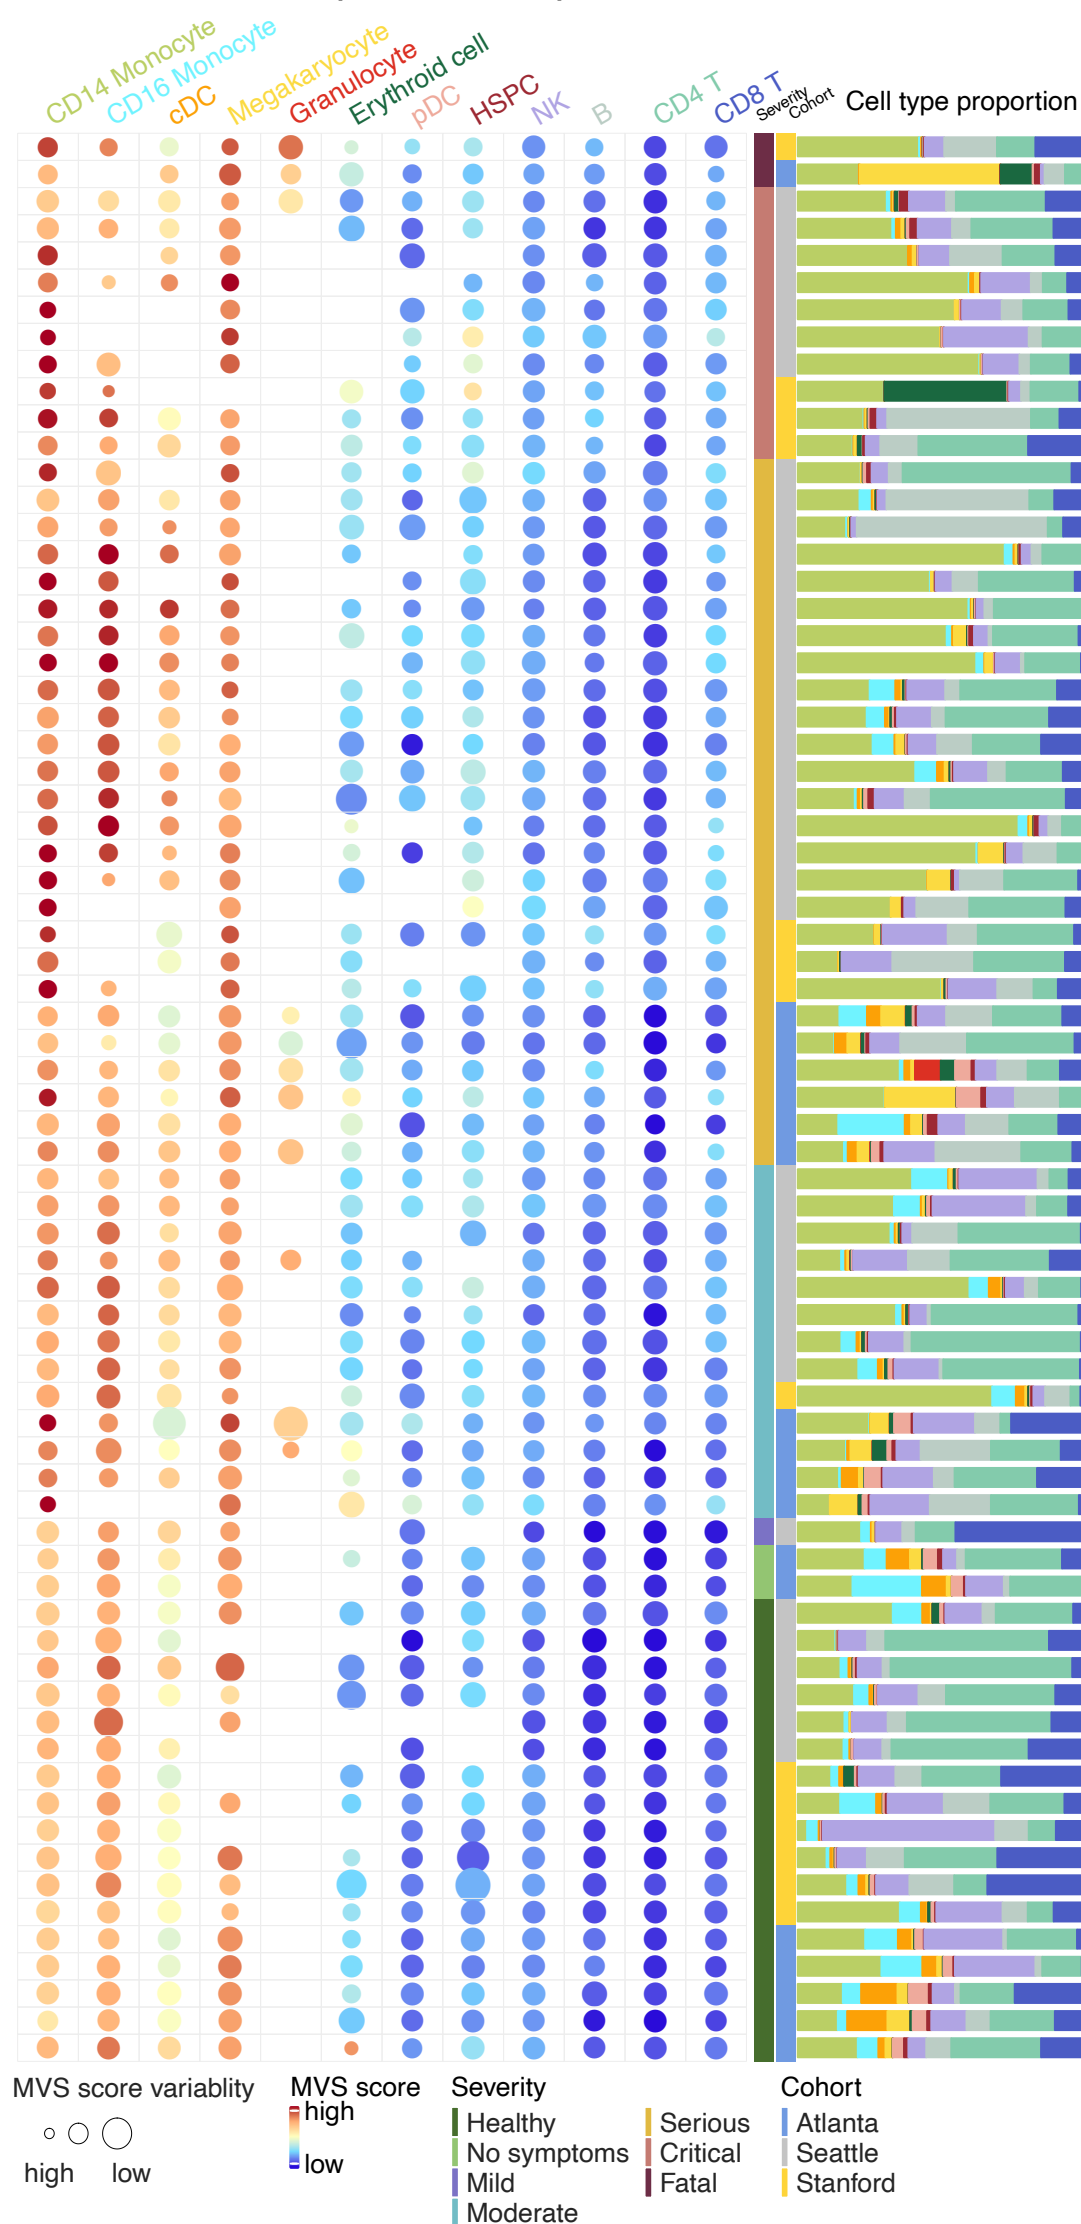

b. Deconvolution of bulk transcriptome

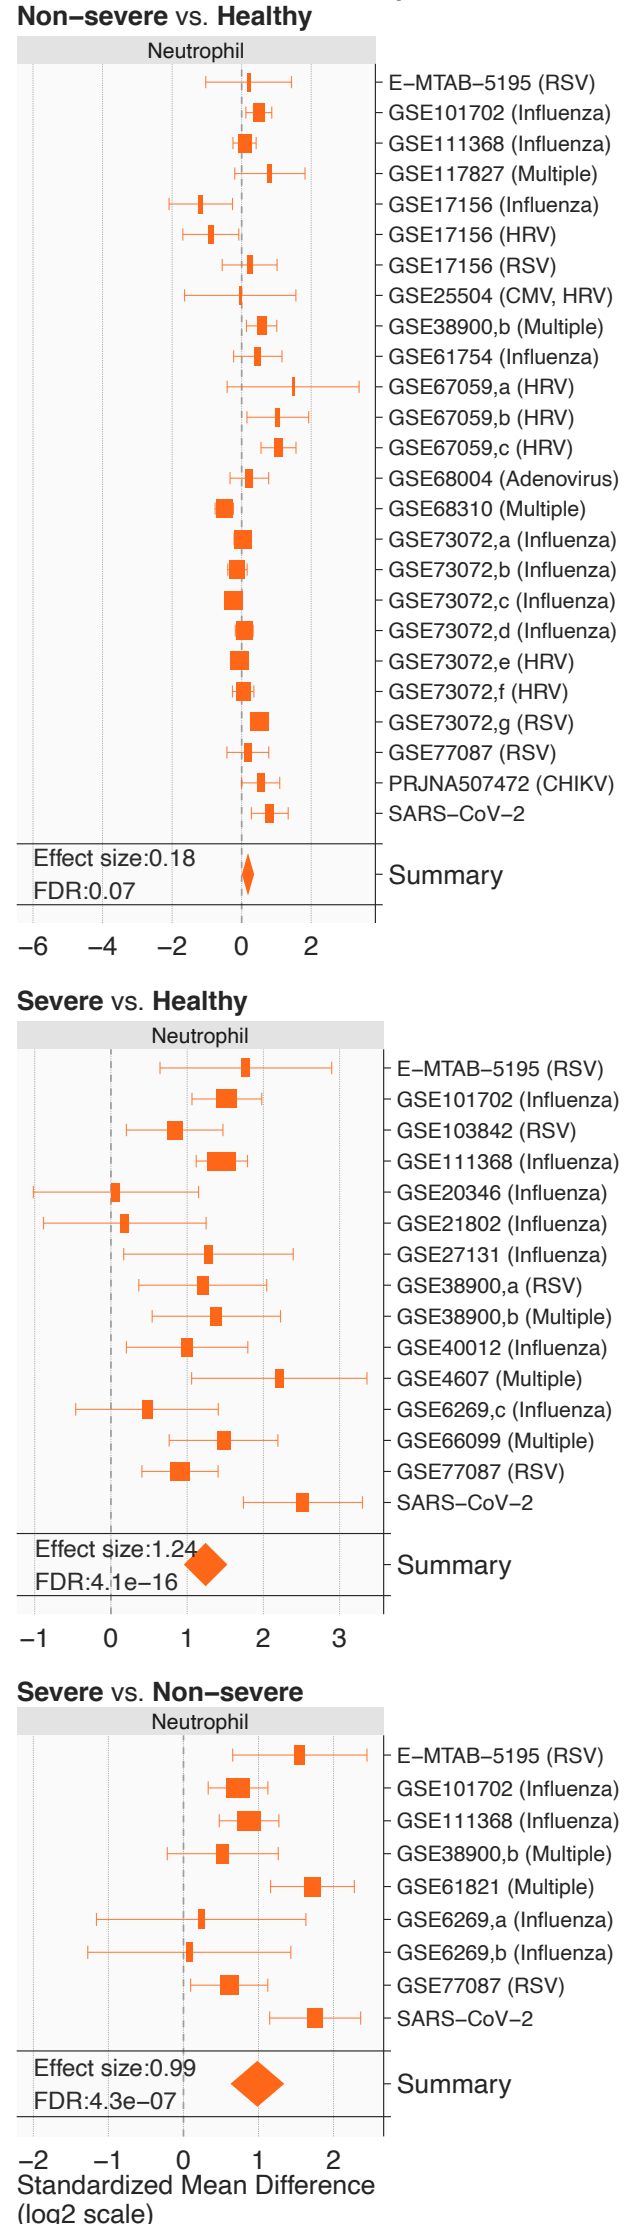

**Figure S3****a**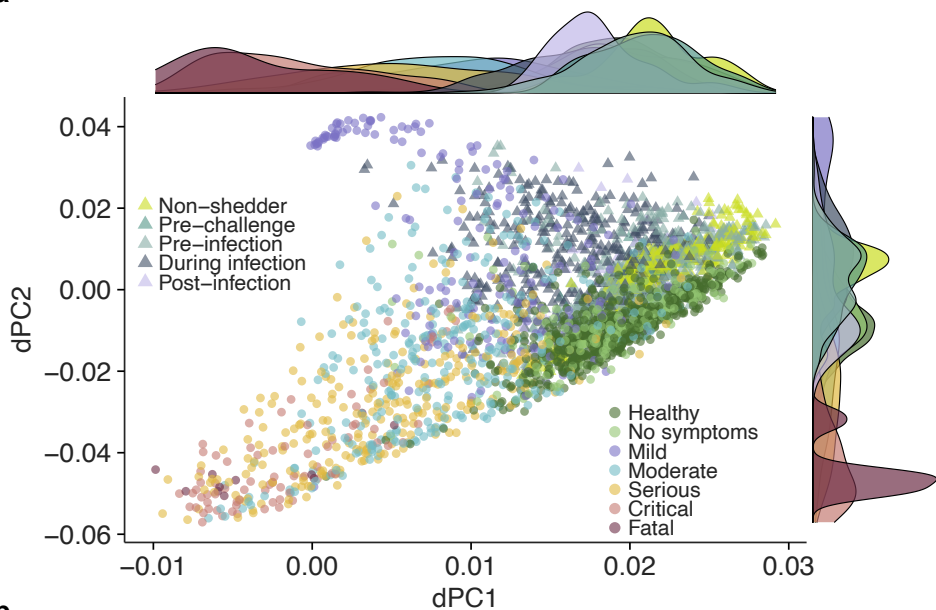**b**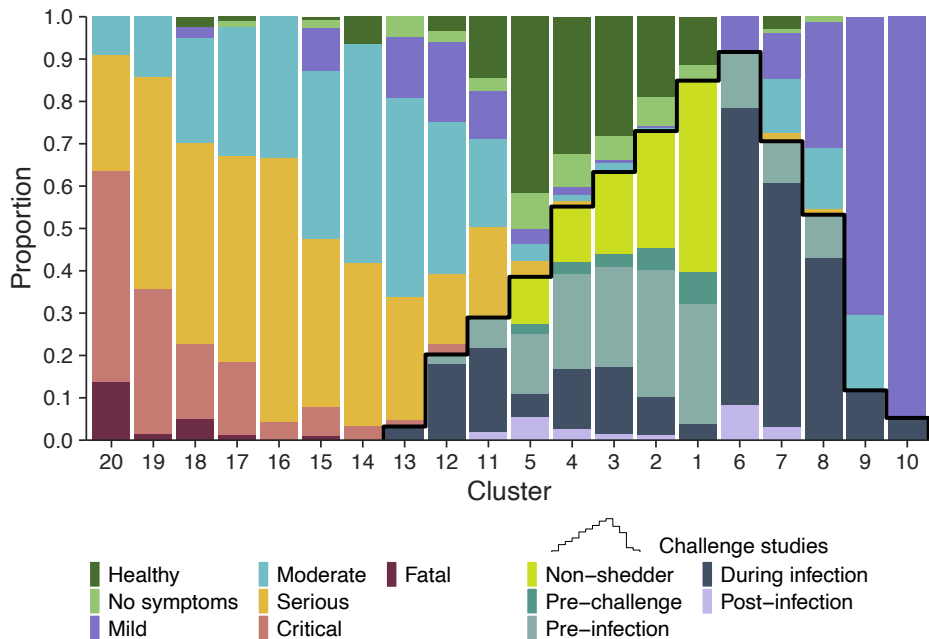

**Figure S4**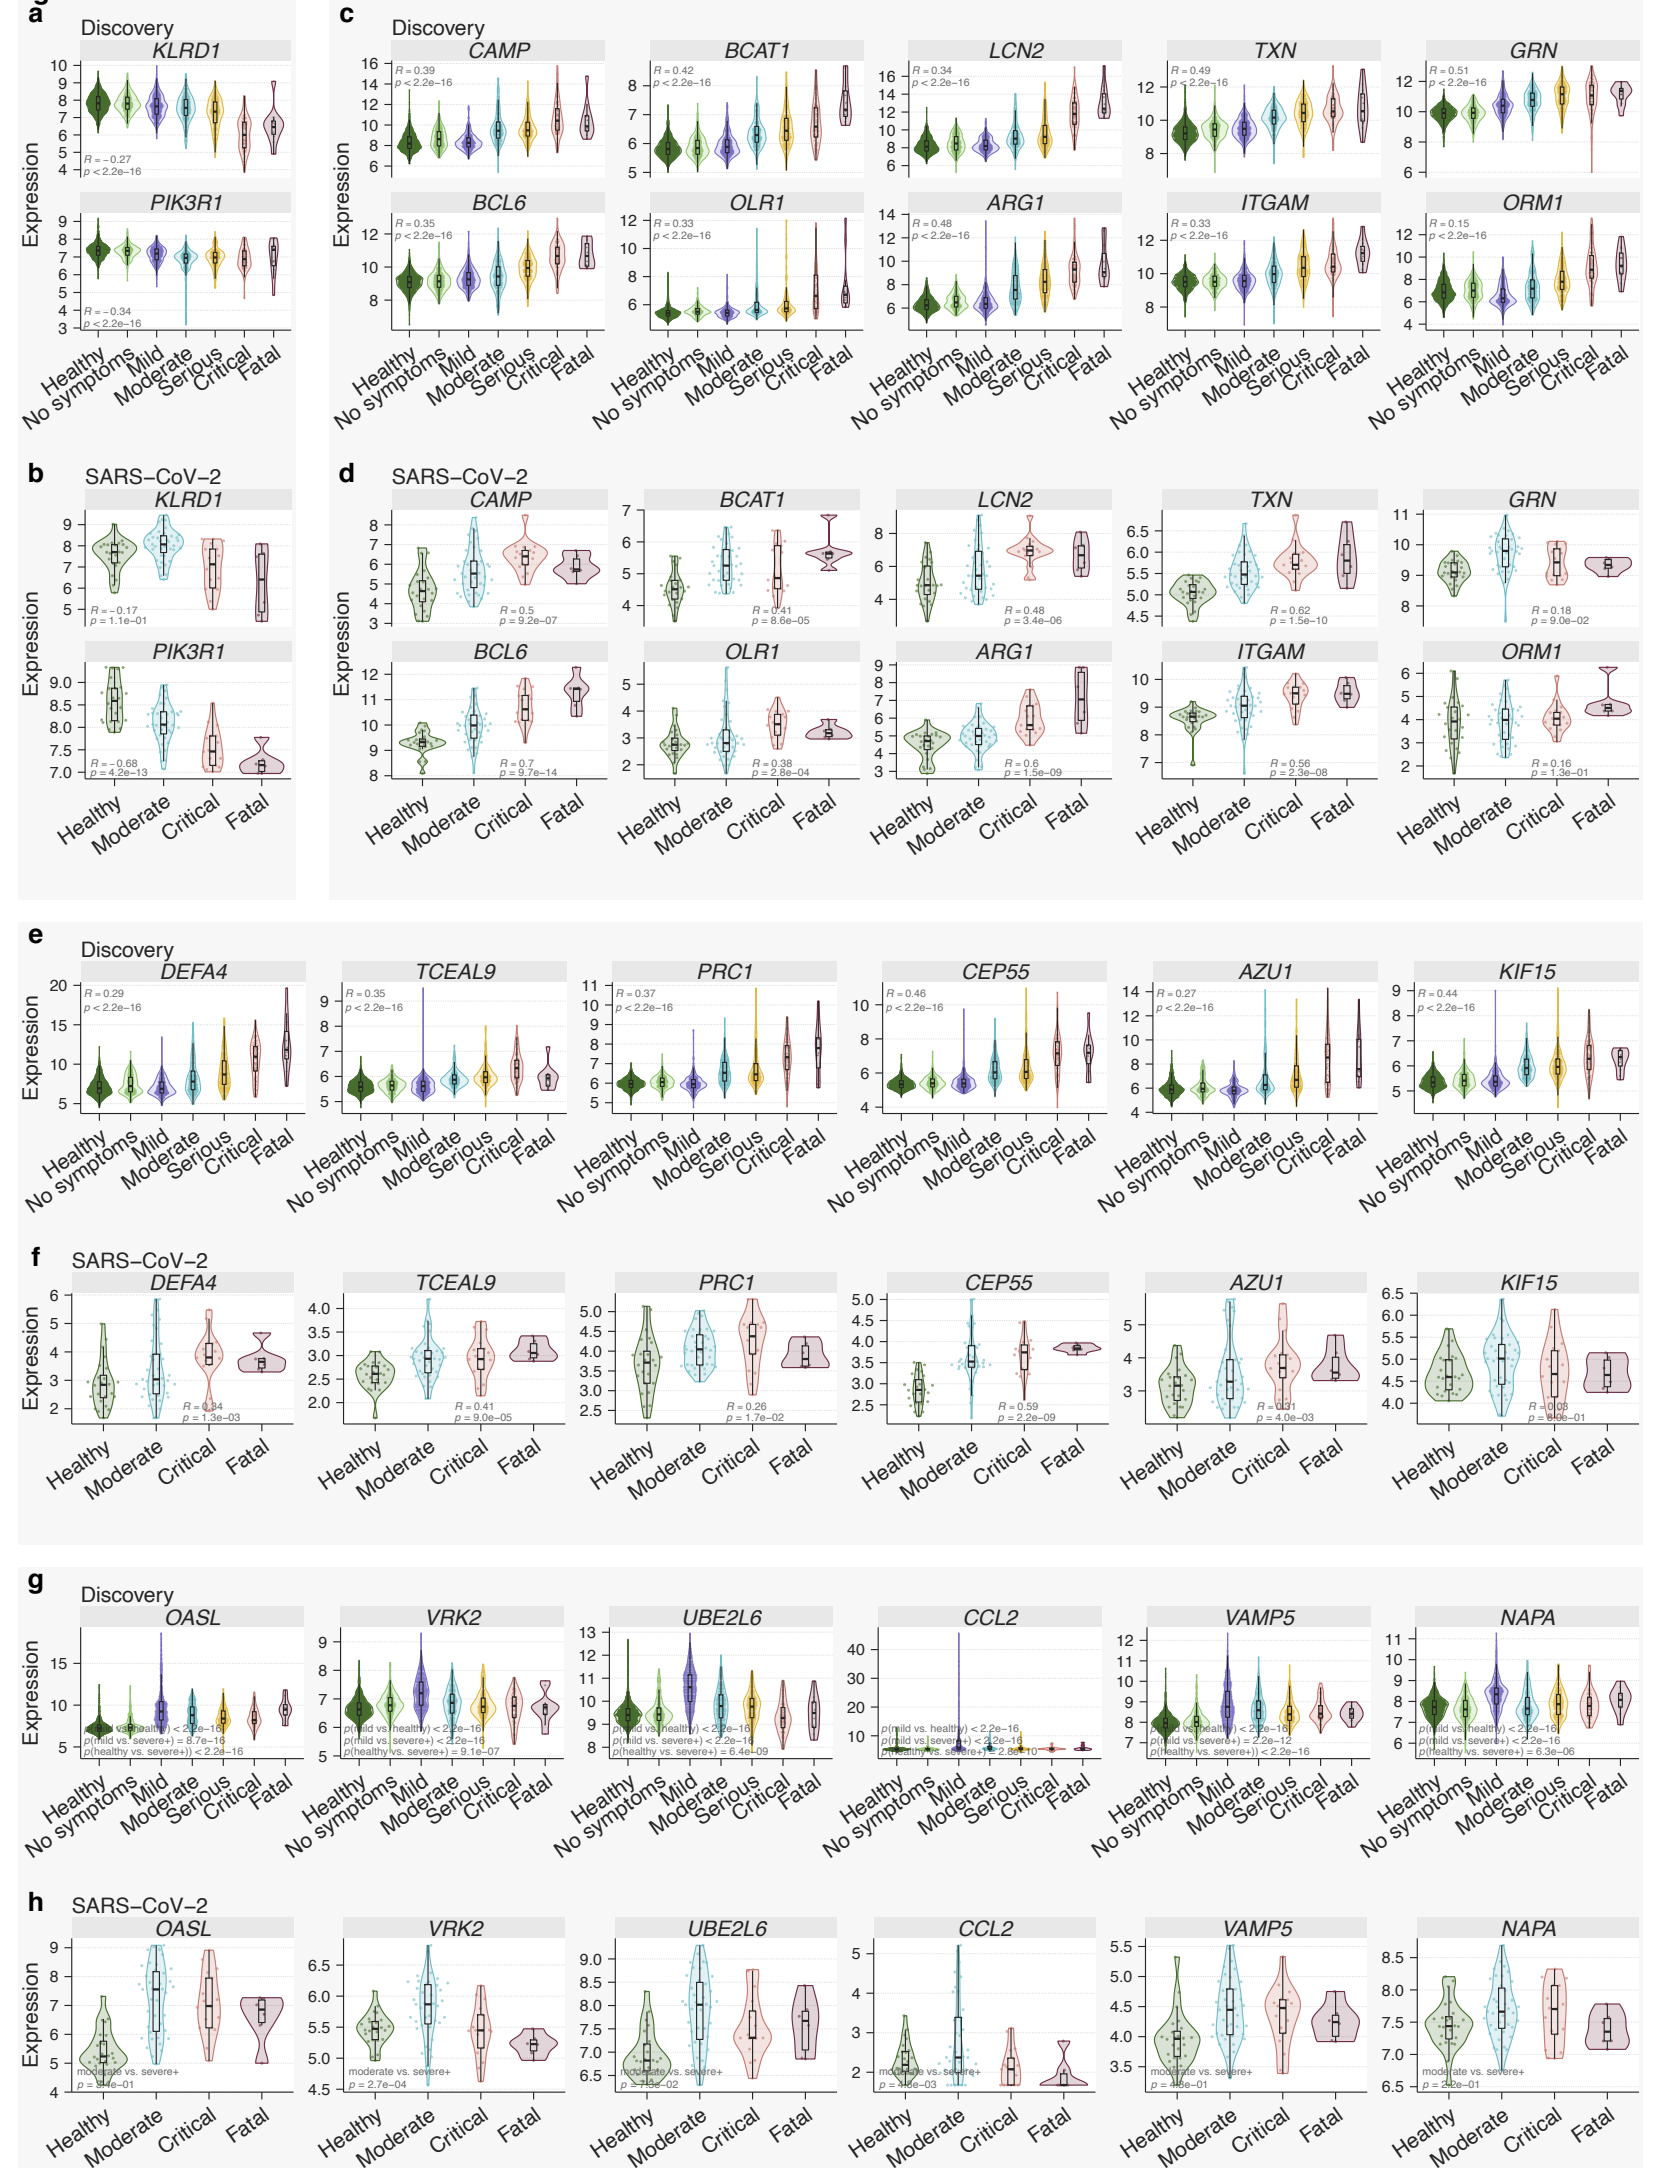

**Figure S5**

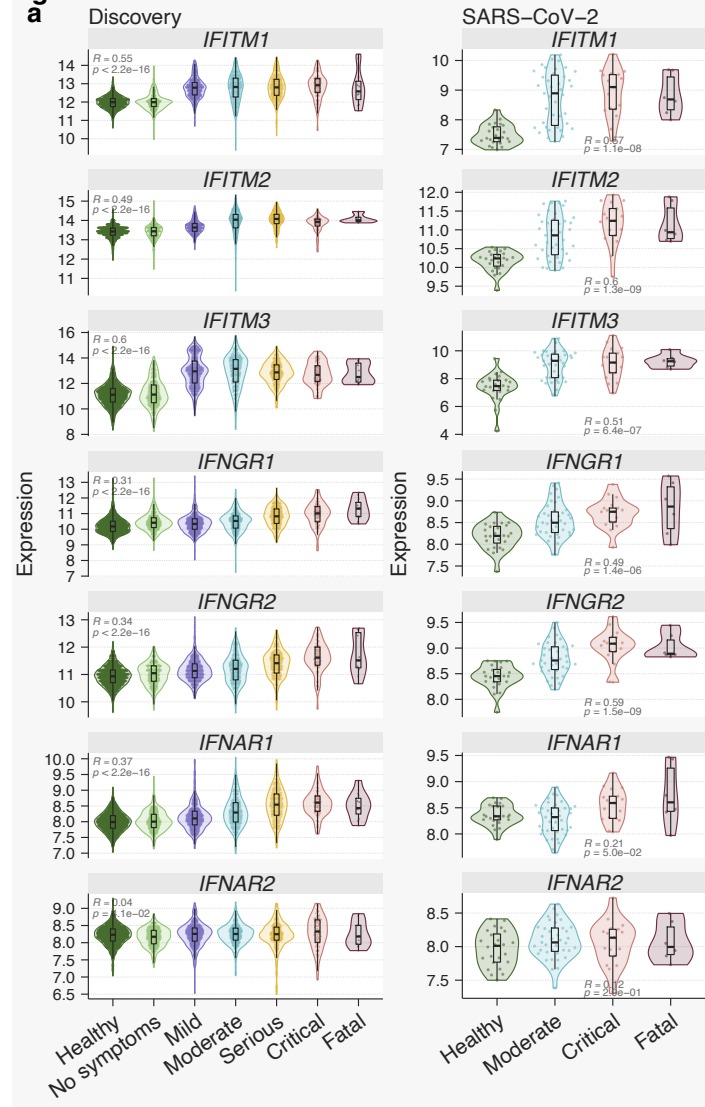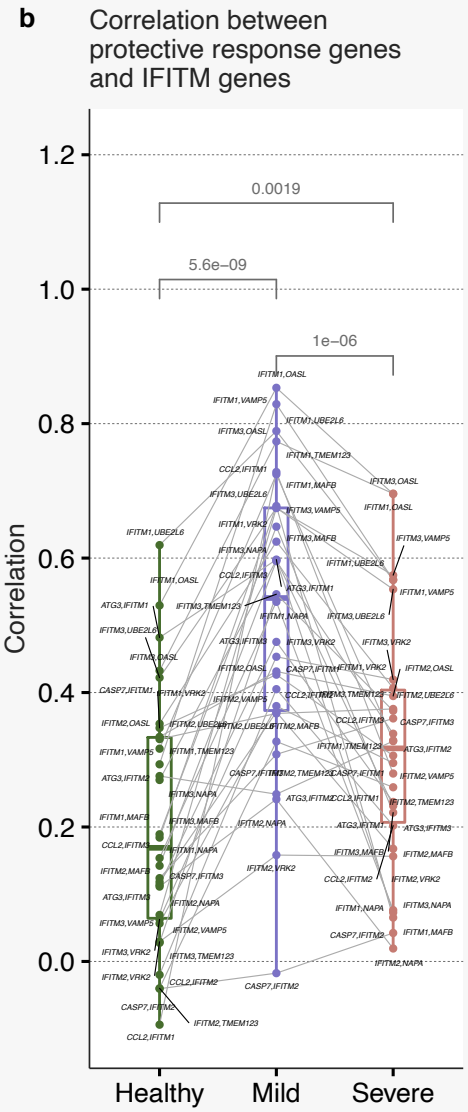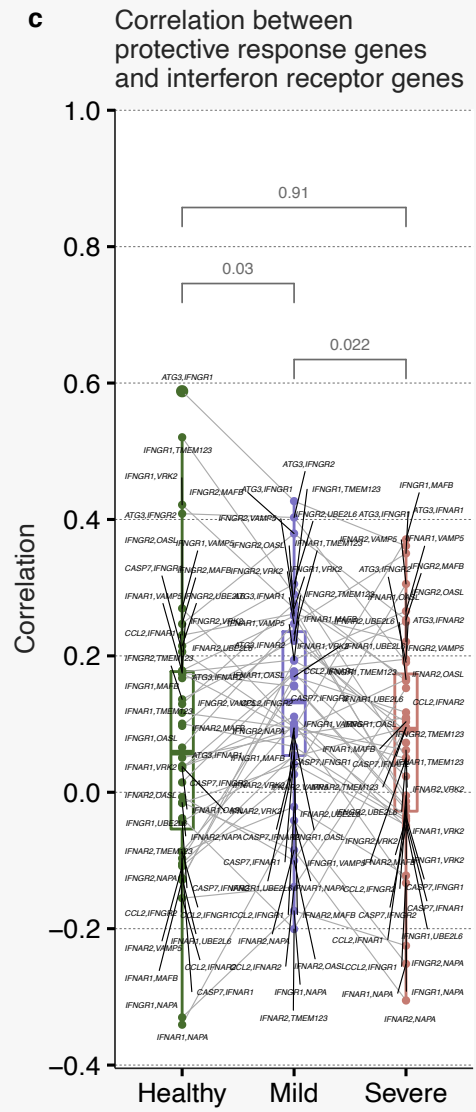

Figure S6

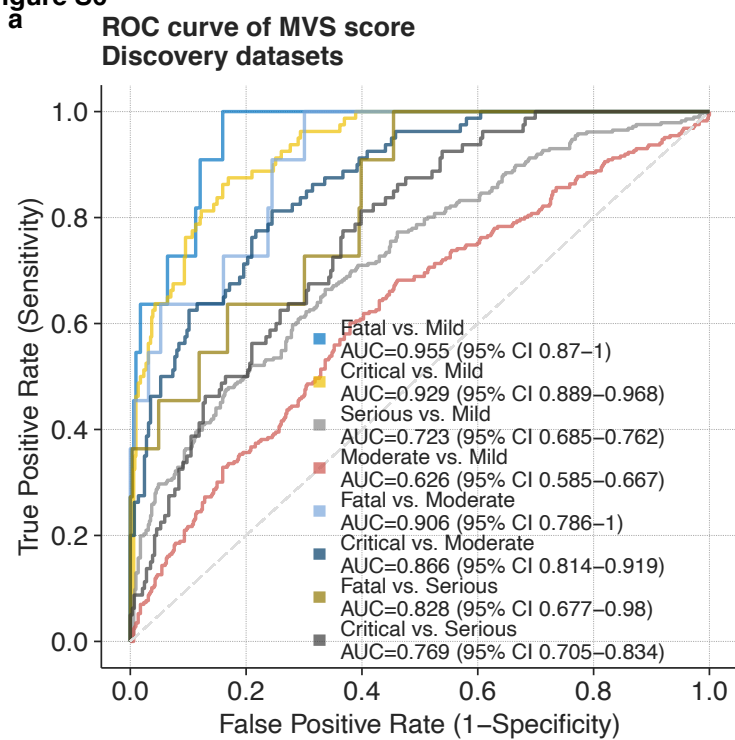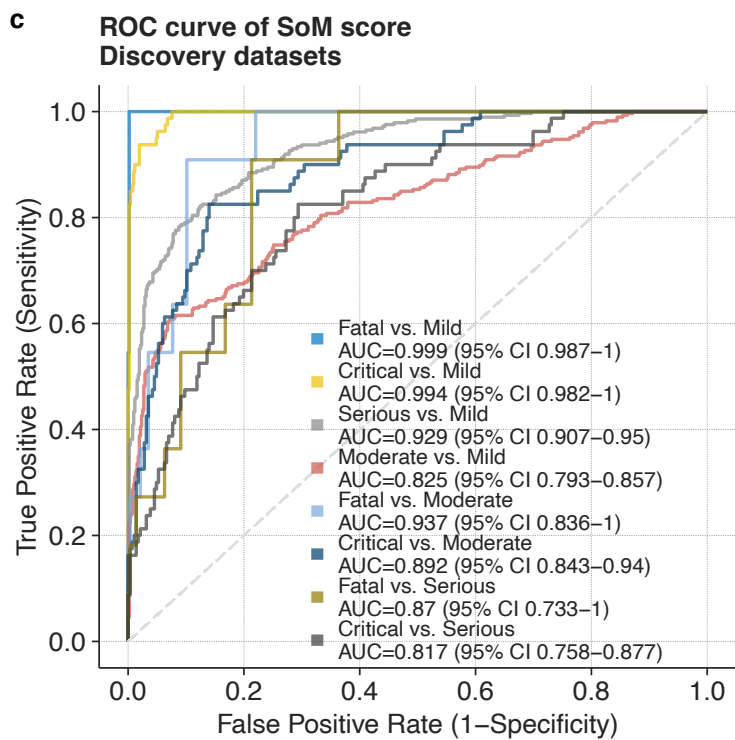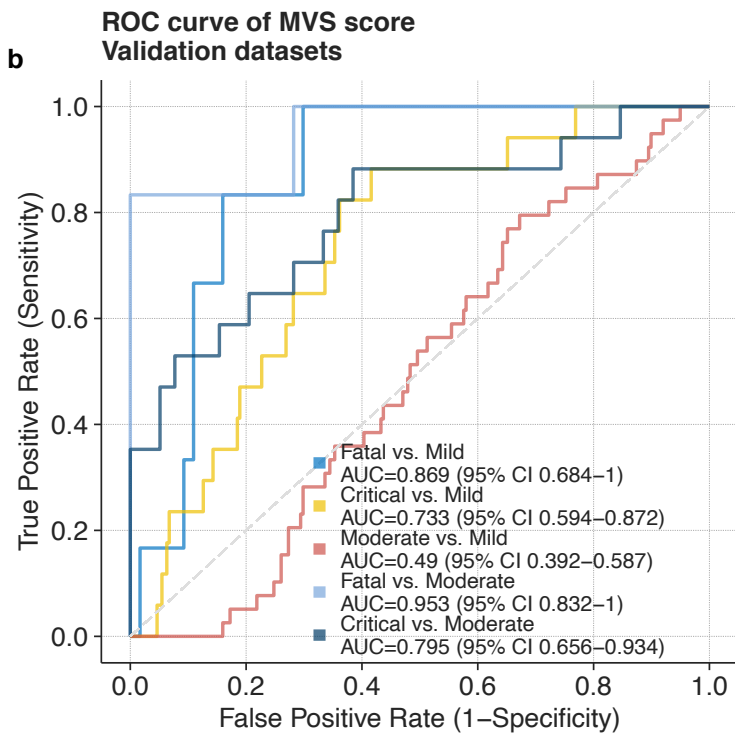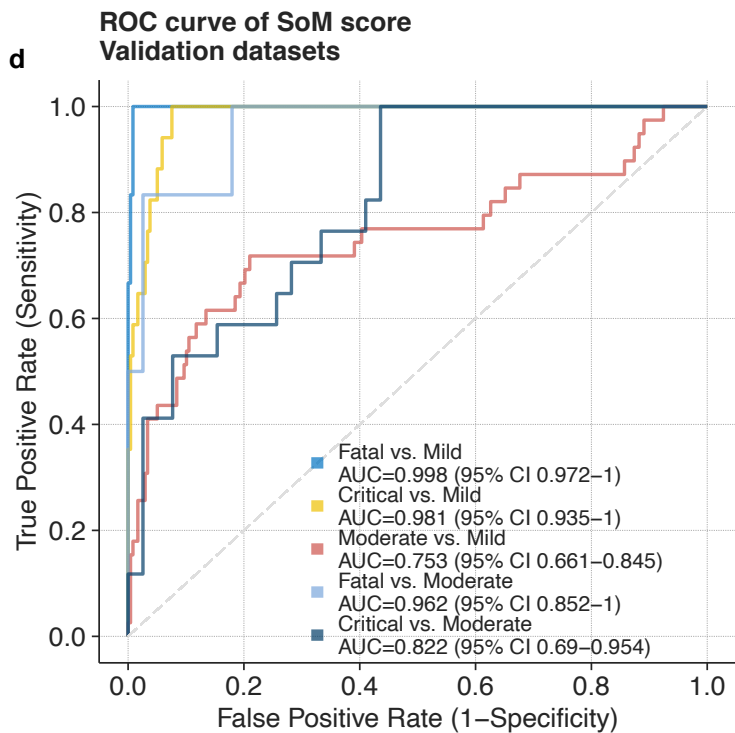

Figure S7

## All MVS genes vs. 251-gene subset

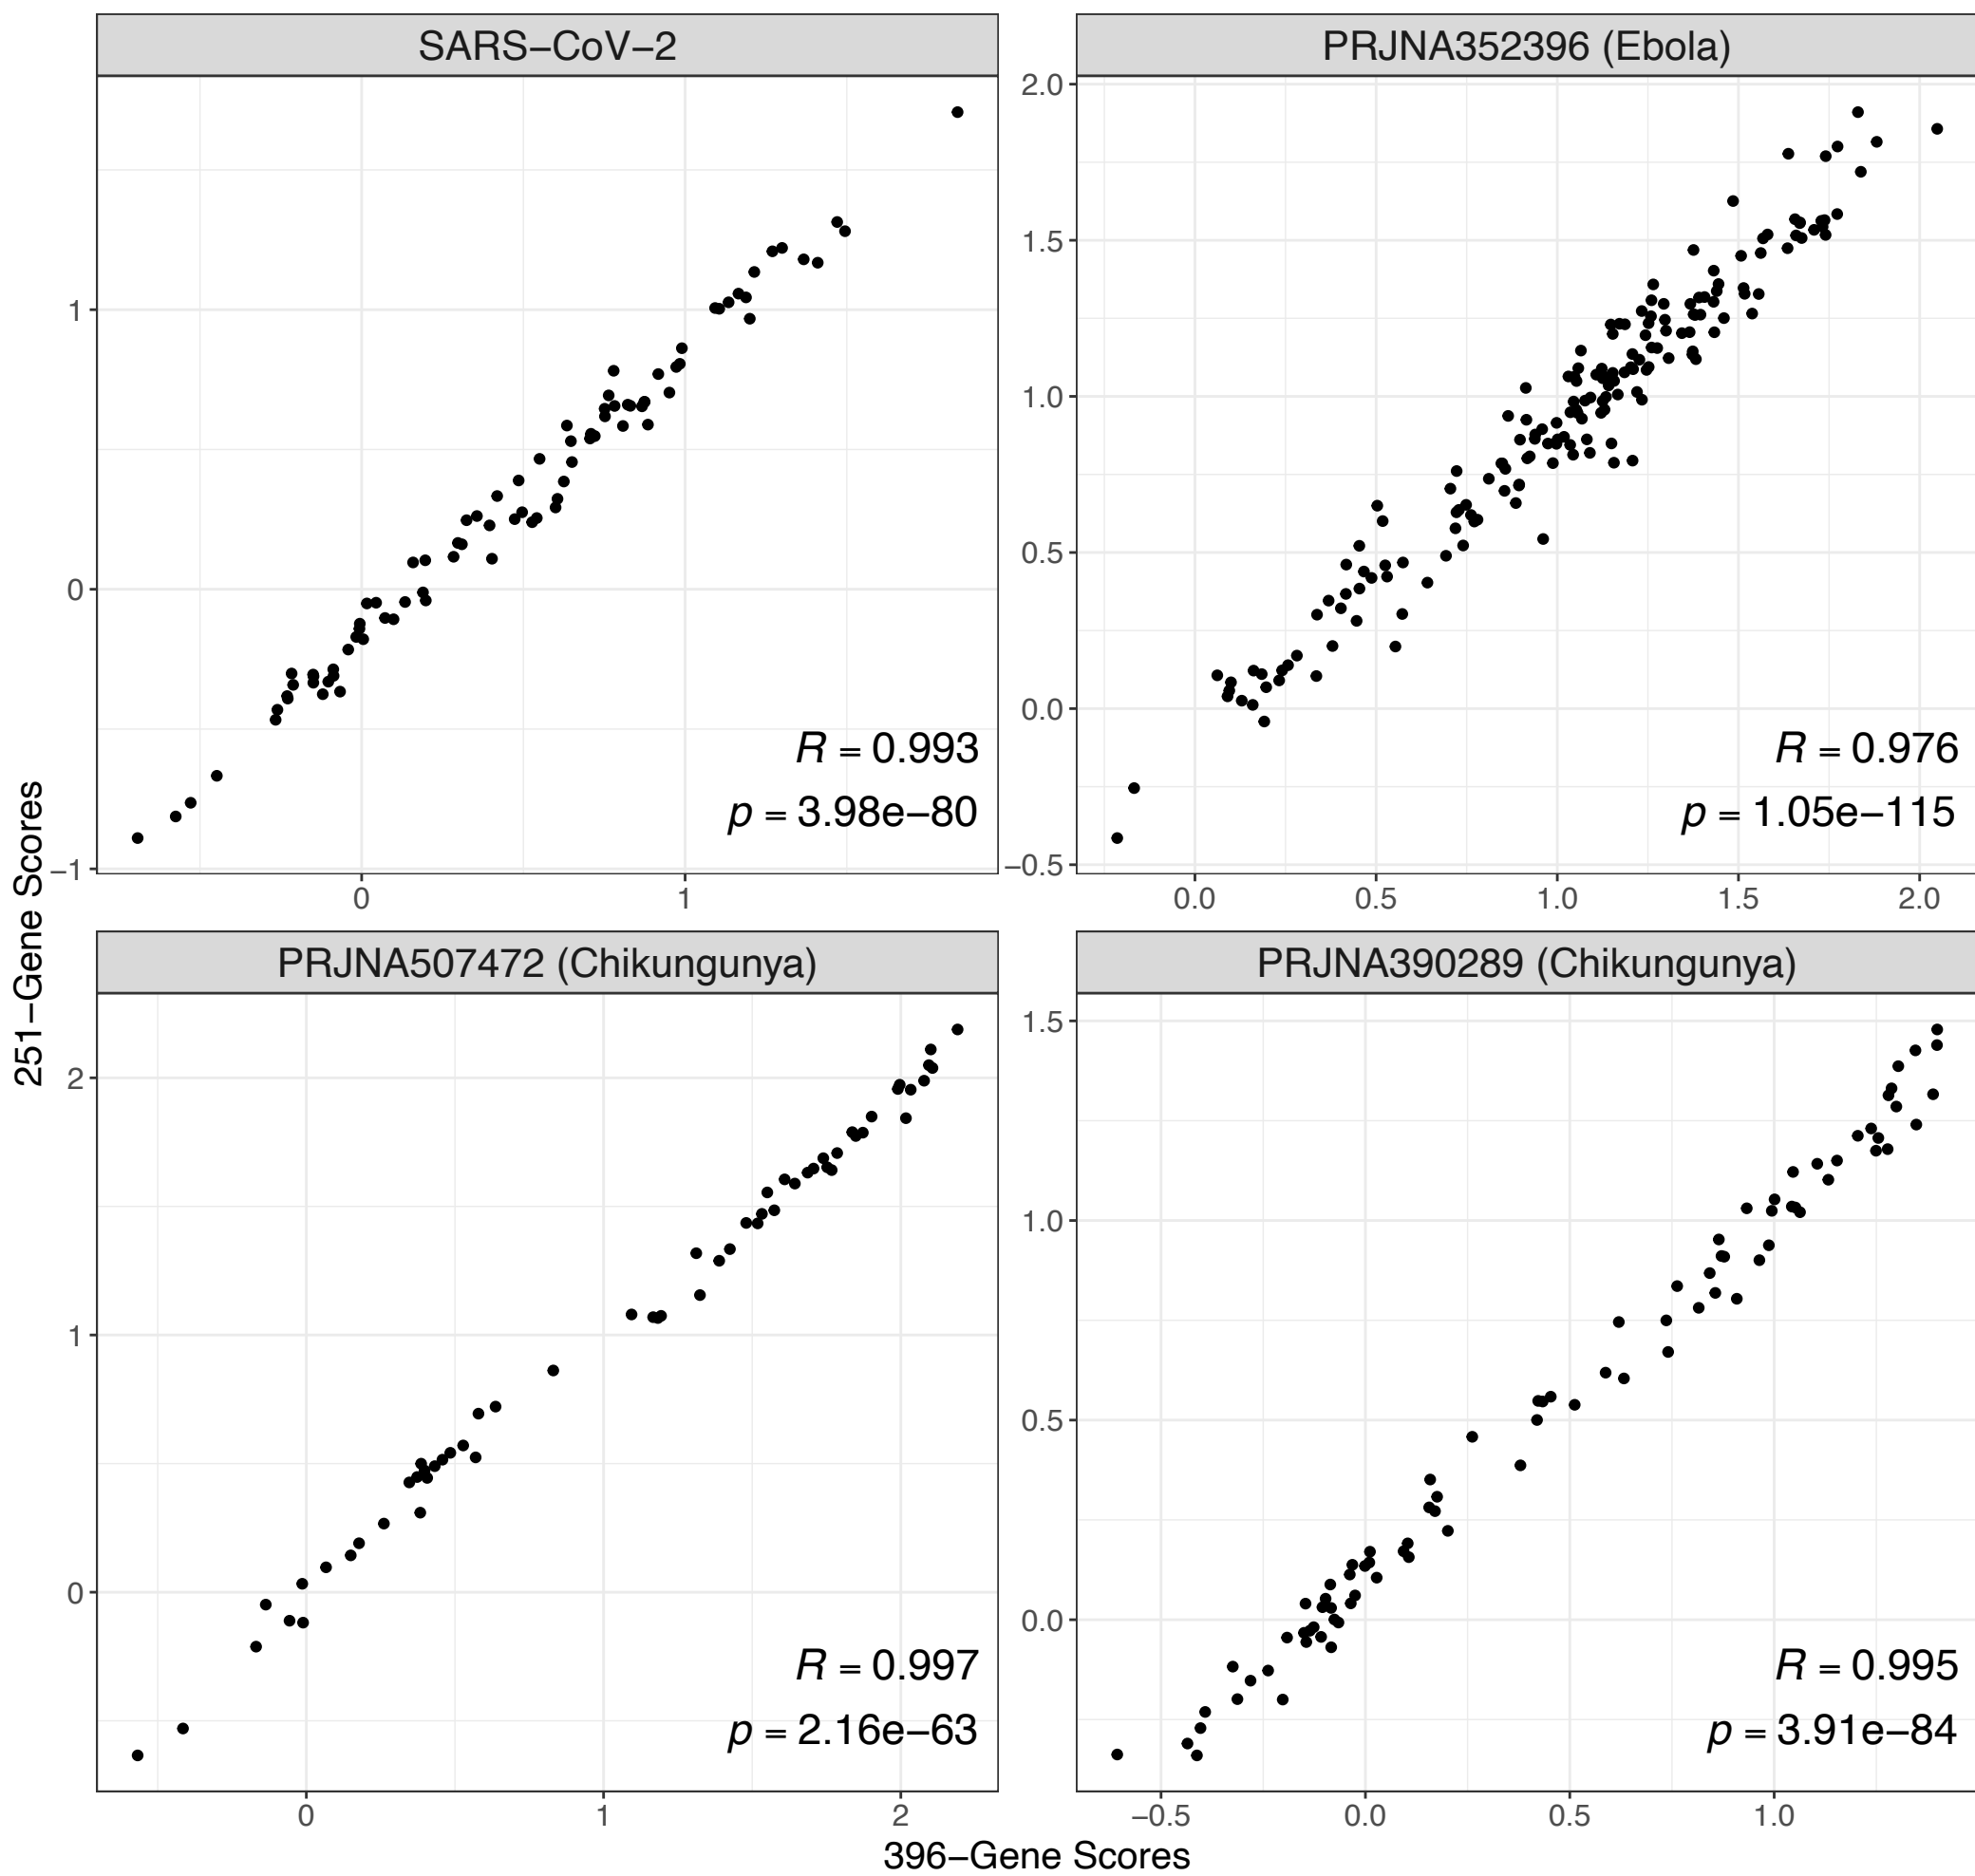

Supplement: Supplementary file [file media-1.pdf]
